# Supplementary material
Source: publisher figshare collection journal article supplement (https://gsajournals.figshare.com/ndownloader/files/14929757)

# Hypothalamus

KEGG Pathway Enrichment: Genes that are induced by reproductive experience (higher in primiparous)

Glycolysis/gluconeogenesis

Enrichment FDR: 1.7E-02

Genes in list are highlighted in red

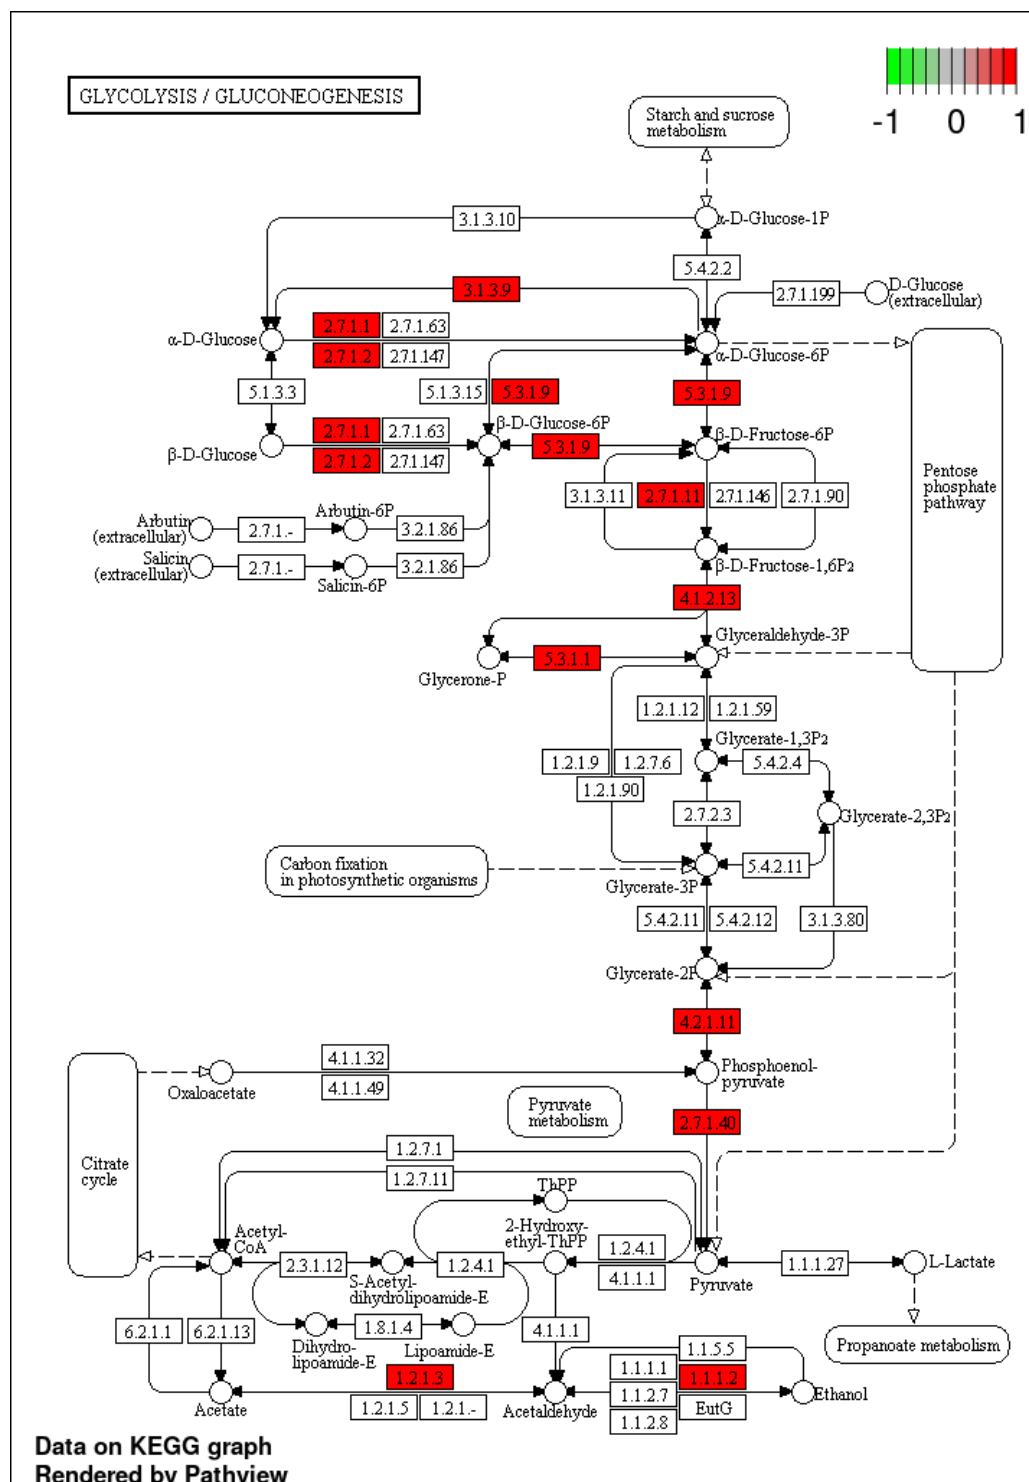

Supplement: Supplementary file 1 [file 14929757]
